# Supplementary material for: Detection of selenoprotein transcriptome in chondrocytes of patients with Kashin–Beck disease
Source: Frontiers journal article supplement (doi:10.3389/fcell.2023.1083904), 2023-02-17
Supplement: Table_1.pdf [file Table_1.pdf]

**Table S1 Characteristics of adolescent/adult patients with KBD and control used for and IHC**

| Sample pair | KBD         |        | Normal     |        |
|-------------|-------------|--------|------------|--------|
|             | Age (years) | Gender | Age(years) | Gender |
| Adult       |             |        |            |        |
| 1           | 58          | Female | 55         | Female |
| 2           | 64          | Female | 60         | Female |
| 3           | 53          | Male   | 51         | Male   |
| 4           | 53          | Female | 59         | Female |
| 5           | 54          | Male   | 55         | Male   |
| 6           | 55          | Male   | 49         | Male   |
| Adolescent  |             |        |            |        |
| 1           | 7           | Male   | 6          | Male   |
| 2           | 9           | Male   | 7          | Male   |
| 3           | 8           | Male   | 8          | Male   |
| 4           | 6           | Female | 5          | Female |
| -           | -           | -      | 9          | Male   |
| -           | -           | -      | 7          | Female |
| Mean        | 7.5         | -      | 7          | -      |
